# Supplementary material
Source: MDPI journal article supplement (https://www.mdpi.com/2072-4292/15/12/3192)
Supplement: s1 [file s1 › remotesensing-2407476-supplementary.pdf]

# Applying Reconstructed Daily Water Storage and Modified Wetness Index to Flood Monitoring: A Case Study in the Yangtze River Basin

Cuiyu Xiao <sup>1</sup>, Yulong Zhong <sup>1,\*</sup>, Yunlong Wu <sup>1</sup>, Hongbing Bai <sup>1</sup>, Wanqiu Li <sup>2</sup>, Dingcheng Wu <sup>3</sup>, Changqing Wang <sup>4</sup> and Baoming Tian <sup>1</sup>

<sup>1</sup> School of Geography and Information Engineering, China University of Geosciences (Wuhan), Wuhan 430078, China; cyxiao@cug.edu.cn (C.X.); wuyunlong@cug.edu.cn (Y.W.); baihb@cug.edu.cn (H.B.); tianbaoming@cug.edu.cn (B.T.)

<sup>2</sup> School of Surveying and Geo-Informatics, Shandong Jianzhu University, Jinan 250101, China; 24106@sdjzu.edu.cn

<sup>3</sup> North Information Control Research Academy Group Co., Ltd., Nanjing 211111, China; wdc1010@live.com

<sup>4</sup> State Key Laboratory of Geodesy and Earth's Dynamics, Innovation Academy for Precision Measurement Science and Technology, Chinese Academy of Sciences, Wuhan 430077, China; whiggssdkd@apm.ac.cn

\* Correspondence: zhongyl@cug.edu.cn

## Contents of this file

- Figure S1-S2
- Equation S1-S2

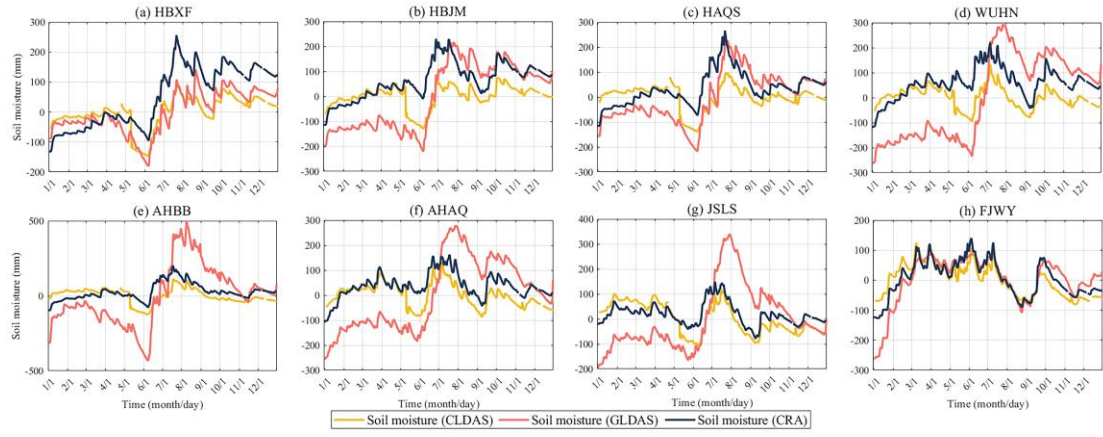

Figure S1. Comparison of three soil moisture products.

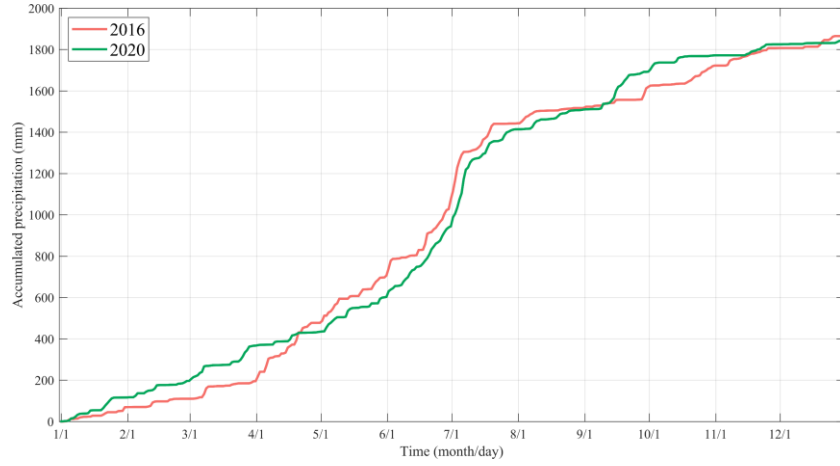

Figure S2. The accumulated precipitation in 2016 and 2020.

TWS change (TWSC) can be calculated from the water balance equation [1] which is expressed as:

$$TWSC(t_1, t_2) = P - E - R \quad (S1)$$

where  $TWSC$  is the TWS change (mm) from  $t_1$  to  $t_2$ ;  $P$ ,  $E$ , and  $R$  is the precipitation, evapotranspiration, and net flows.

The following equation can be derived from the above equation:

$$TWSA(t) = TWSA(t-1) + P(t) - E(t) - R(t) \quad (S2)$$

- [1] M. Rodell, "Basin scale estimates of evapotranspiration using GRACE and other observations," *Geophysical Research Letters*, vol. 31, no. 20, 2004.
